# Supplementary material for: Reversible stimuli-responsive controlled release using mesoporous silica nanoparticles functionalized with a smart DNA molecule-gated switch
Source: Royal Society of Chemistry journal article supplement (doi:10.1039/c2jm32185h), 2012-01-01
Supplement: c2jm32185h.pdf [file c2jm32185h.pdf]

## Supplementary Information

### **Reversible stimuli-responsive controlled release using mesoporous silica nanoparticles functionalized with smart DNA molecule-gated switch**

Dinggeng He<sup>§</sup>, Xiaoxiao He<sup>§</sup>, Kemin Wang\*, Mian Chen, Jie Cao, Yingxiang Zhao

*State Key Laboratory of Chemo/Biosensing and Chemometrics, College of Chemistry and Chemical Engineering, College of Biology, Key Laboratory for Bio-Nanotechnology and Molecular Engineering of Hunan Province, Hunan University, Changsha 410082, P. R. China.*

E-mail: kmwang@hnu.edu.cn

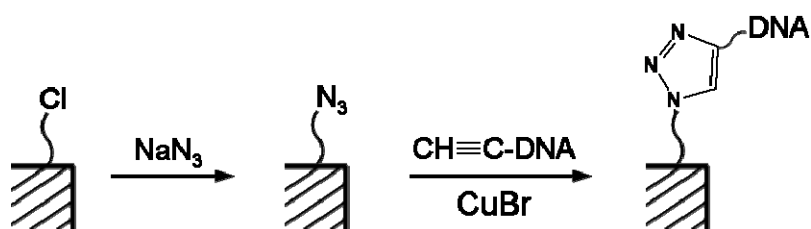

**Scheme S1.** Schematic outline of synthesis of MSN- $\text{N}_3$  and MSN-DNA.

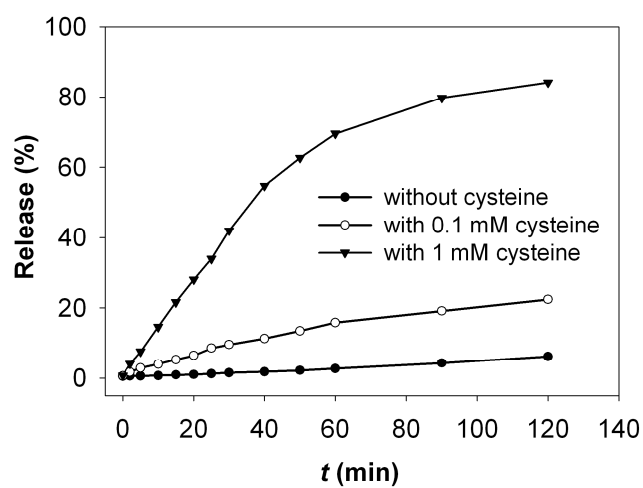

**Figure S1.** The cysteine-responsive release profiles of  $\text{Ru}(\text{bipy})_3^{2+}$  from the MSN-dsDNA system.

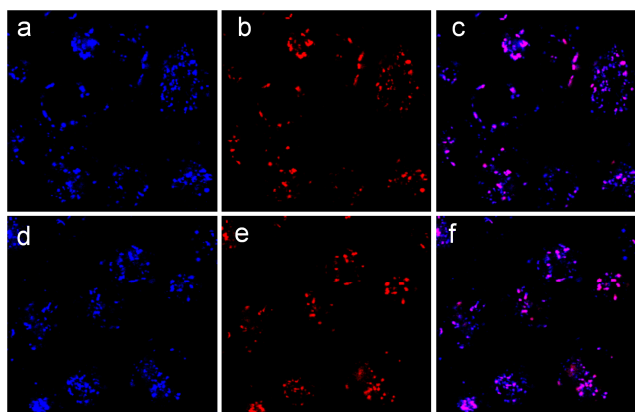

**Figure S2.** CLSM images of the cellular uptake and controlled-release behaviors of  $\text{Ru}(\text{bipy})_3^{2+}$  molecules (red fluorescence) from the self-complementary duplex DNA-capped MSN after incubation with HeLa cells for 3 h (a–c) and 8 h (d–f) at 37 °C. Lysotracker blue (blue fluorescence) was used to stain the lysosomes. Cells were imaged using a 100× oil-immersion objective. The localization of nanoparticles inside of lysosomes was shown based on the merge of blue and red spots (orange).
